# Supplementary material for: Measuring the availability of human resources for health and its relationship to universal health coverage for 204 countries and territories from 1990 to 2019: a systematic analysis for the Global Burden of Disease Study 2019
Source: PubMed Central journal article supplement (PMC9168805; doi:10.1016/s0140-6736(22)00532-3), 2022-06-04
Supplement: mmc2.pdf [file mmc2.pdf]

# THE LANCET

## Supplementary appendix 2

This appendix formed part of the original submission and has been peer reviewed. We post it as supplied by the authors.

Supplement to: GBD 2019 Human Resources for Health Collaborators. Measuring the availability of human resources for health and its relationship to universal health coverage for 204 countries and territories from 1990 to 2019: a systematic analysis for the Global Burden of Disease Study 2019. *Lancet* 2022; published online May 23. [https://doi.org/10.1016/S0140-6736\(22\)00532-3](https://doi.org/10.1016/S0140-6736(22)00532-3).

**Supplementary results to Measuring the availability of human resources for health and its relationship to universal health coverage: estimates for 204 countries and territories from 1990 to 2019**

These supplementary results contain additional figures and tables.

## Table of Contents

|                                                                                                                                          |       |
|------------------------------------------------------------------------------------------------------------------------------------------|-------|
| List of appendix figures and tables .....                                                                                                | 2     |
| Appendix Figure 1. Dentistry personnel by SDI quintile and year .....                                                                    | 3     |
| Appendix Figure 1. Pharmaceutical personnel by SDI quintile and year .....                                                               | 4     |
| Appendix Figure 2a. Dentistry personnel per 10,000 population, 2019 .....                                                                | 5     |
| Appendix Figure 2b. Pharmaceutical personnel per 10,000 population, 2019 .....                                                           | 6     |
| Appendix Figure 3a. Physicians per 10,000, 1990 .....                                                                                    | 7     |
| Appendix Figure 3b. Nurses and midwives per 10,000, 1990 .....                                                                           | 8     |
| Appendix Figure 3c. Dentistry personnel per 10,000, 1990 .....                                                                           | 9     |
| Appendix Figure 3d. Pharmaceutical personnel per 10,000, 1990 .....                                                                      | 10    |
| Appendix Table 1. Health worker counts for 16 cadres by GBD super-region, 2019 .....                                                     | 11    |
| Appendix Table 2. Health worker shortages for four cadre groups at UHC service coverage of 80 for 204 locations, 2019 .....              | 12-14 |
| Appendix Table 3. SDI quintile and UHC effective coverage index by country and territory in 1990, 2000, 2005, 2010, 2015, and 2019 ..... | 15-18 |

### List of appendix figures and tables

**Appendix Figure 1a.** Dentistry personnel by SDI quintile and year

**Appendix Figure 1b.** Pharmaceutical personnel by SDI quintile and year

**Appendix Figure 2a.** Dentistry personnel per 10,000 population, 2019

**Appendix Figure 2b.** Pharmaceutical personnel per 10,000 population, 2019

**Appendix Figure 3a.** Physicians per 10,000 population, 1990

**Appendix Figure 3b.** Nurses and midwives per 10 000 population, 1990

**Appendix Figure 3c.** Dentistry personnel per 10,000 population, 1990

**Appendix Figure 3d.** Pharmaceutical personnel per 10,000 population, 1990

**Appendix Table 1.** Health worker counts for 16 cadres by GBD super-region, 2019

**Appendix Table 2.** Health worker shortages for four cadre groups at UHC service coverage for 80 for 204 locations, 2019

**Appendix Table 3.** SDI quintile and UHC service coverage index by country and territory in 1990, 2000, 2005, 2010, 2015, and 2019

Appendix Figure 1a. Dentistry personnel by SDI quintile and year

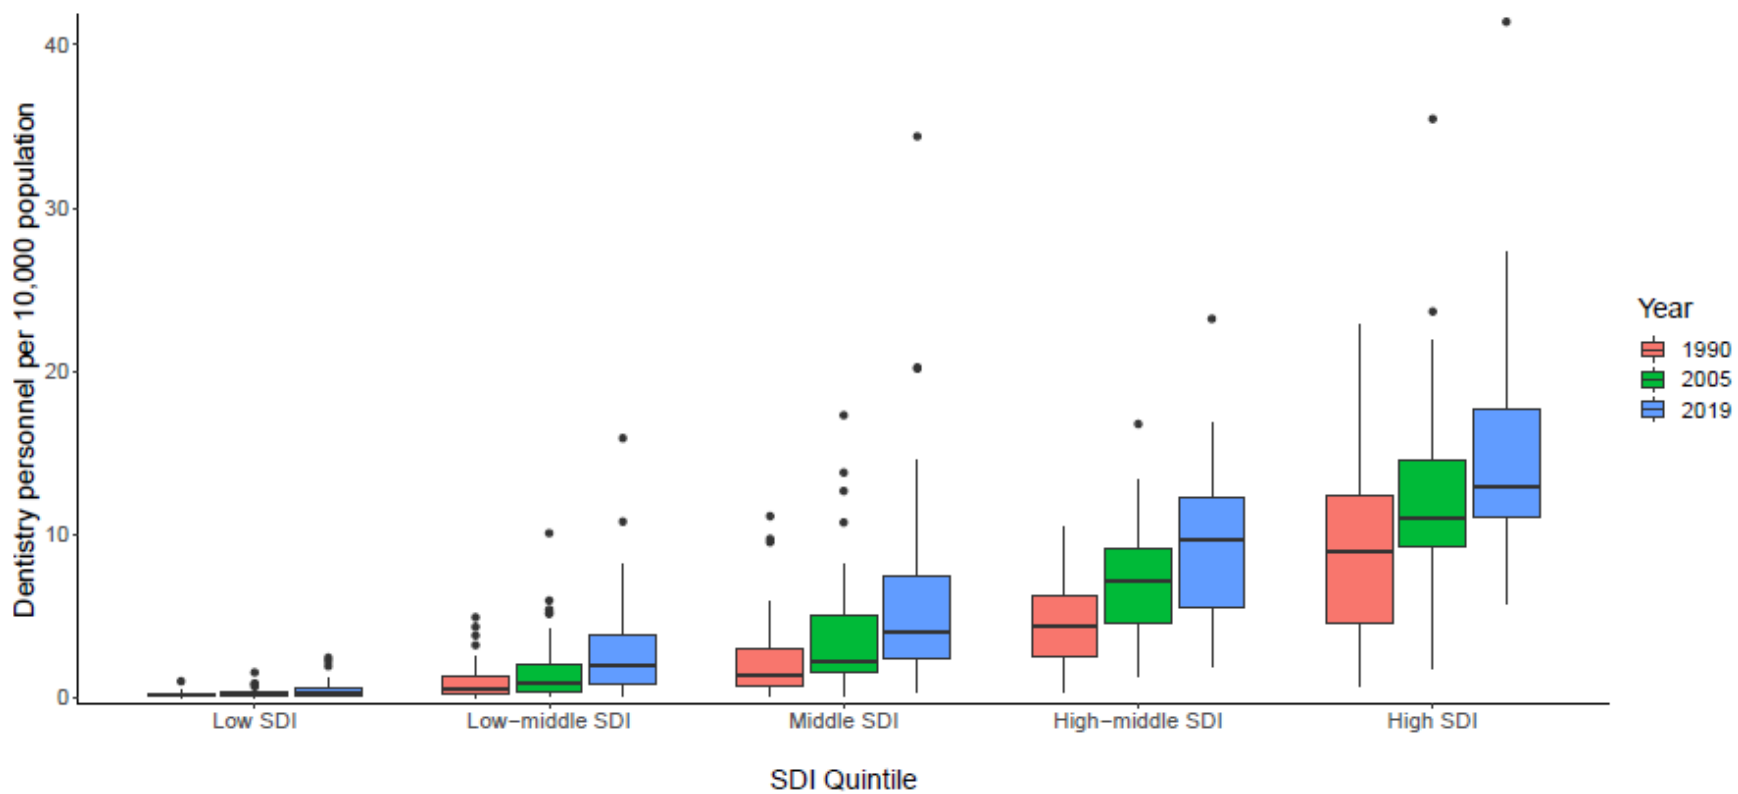

**Appendix Figure 1b.** Pharmaceutical personnel by SDI quintile and year

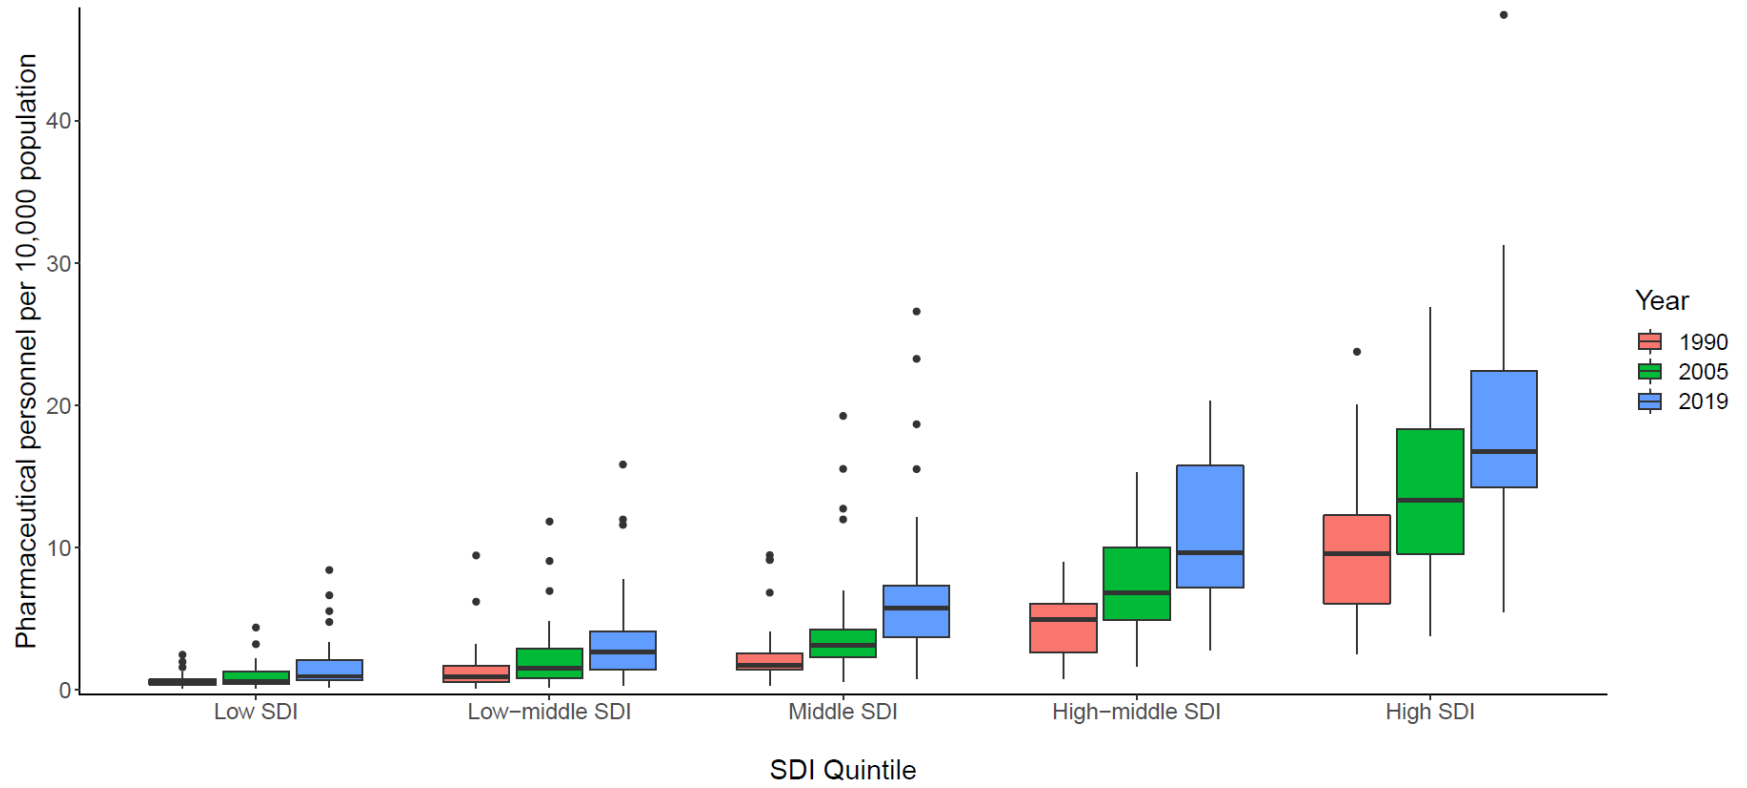

Appendix Figure 2a. Dentistry personnel per 10,000 population, 2019

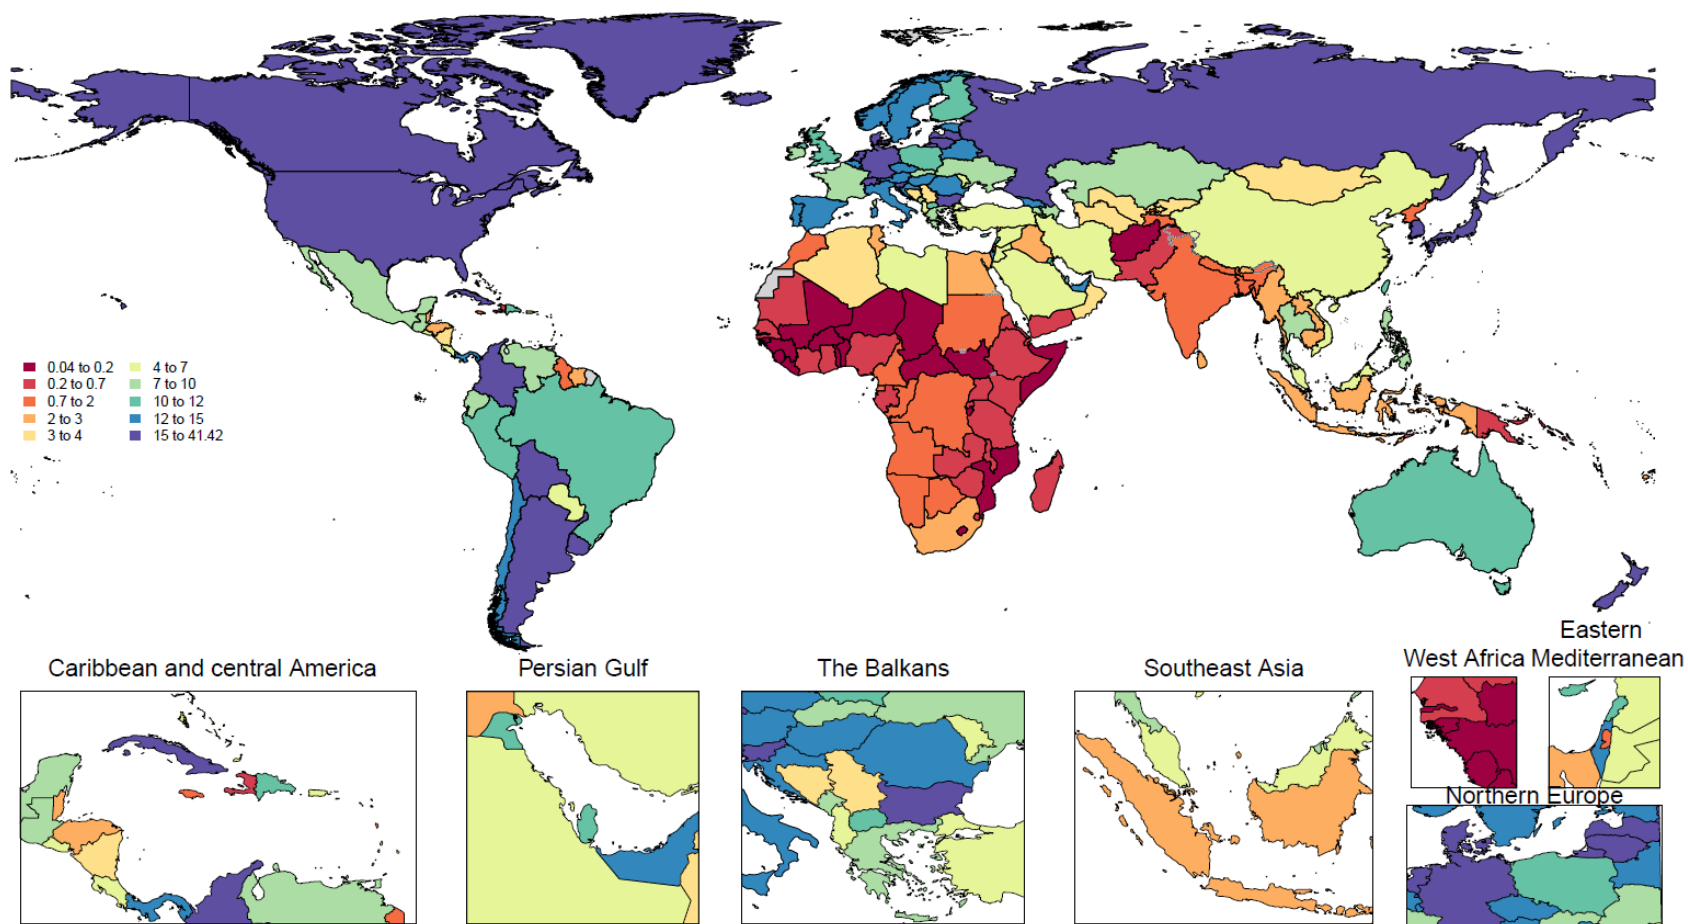

Appendix Figure 2b. Pharmaceutical personnel per 10,000 population, 2019

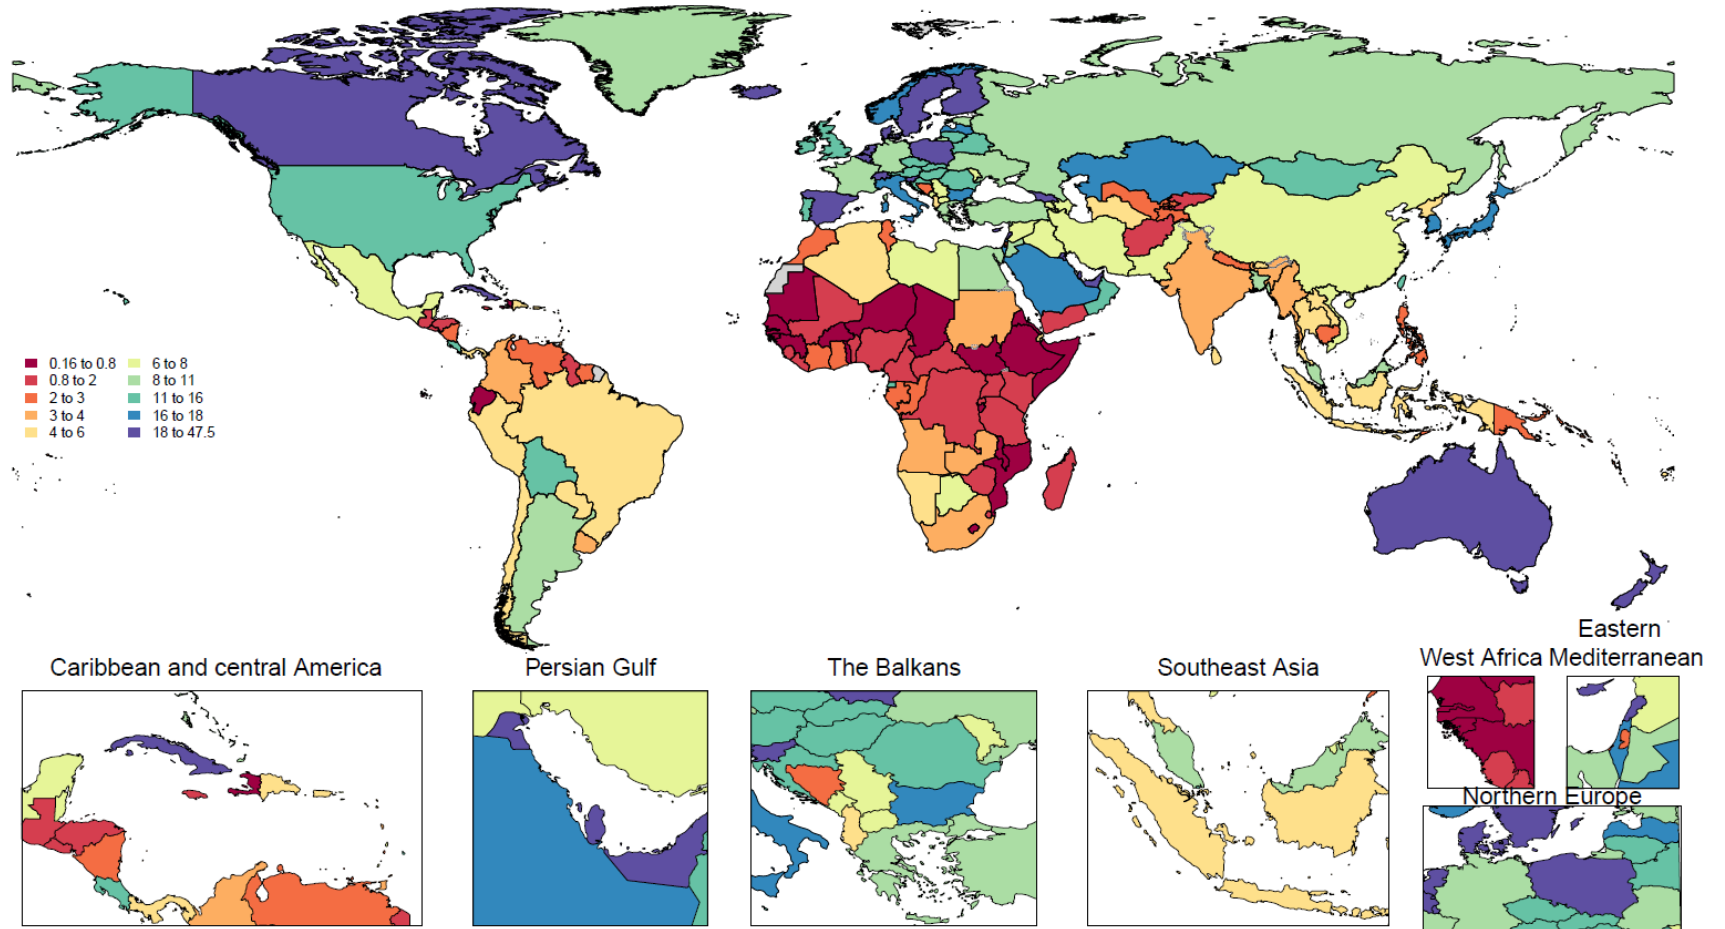



Appendix Figure 3a. Physicians per 10,000 population, 1990

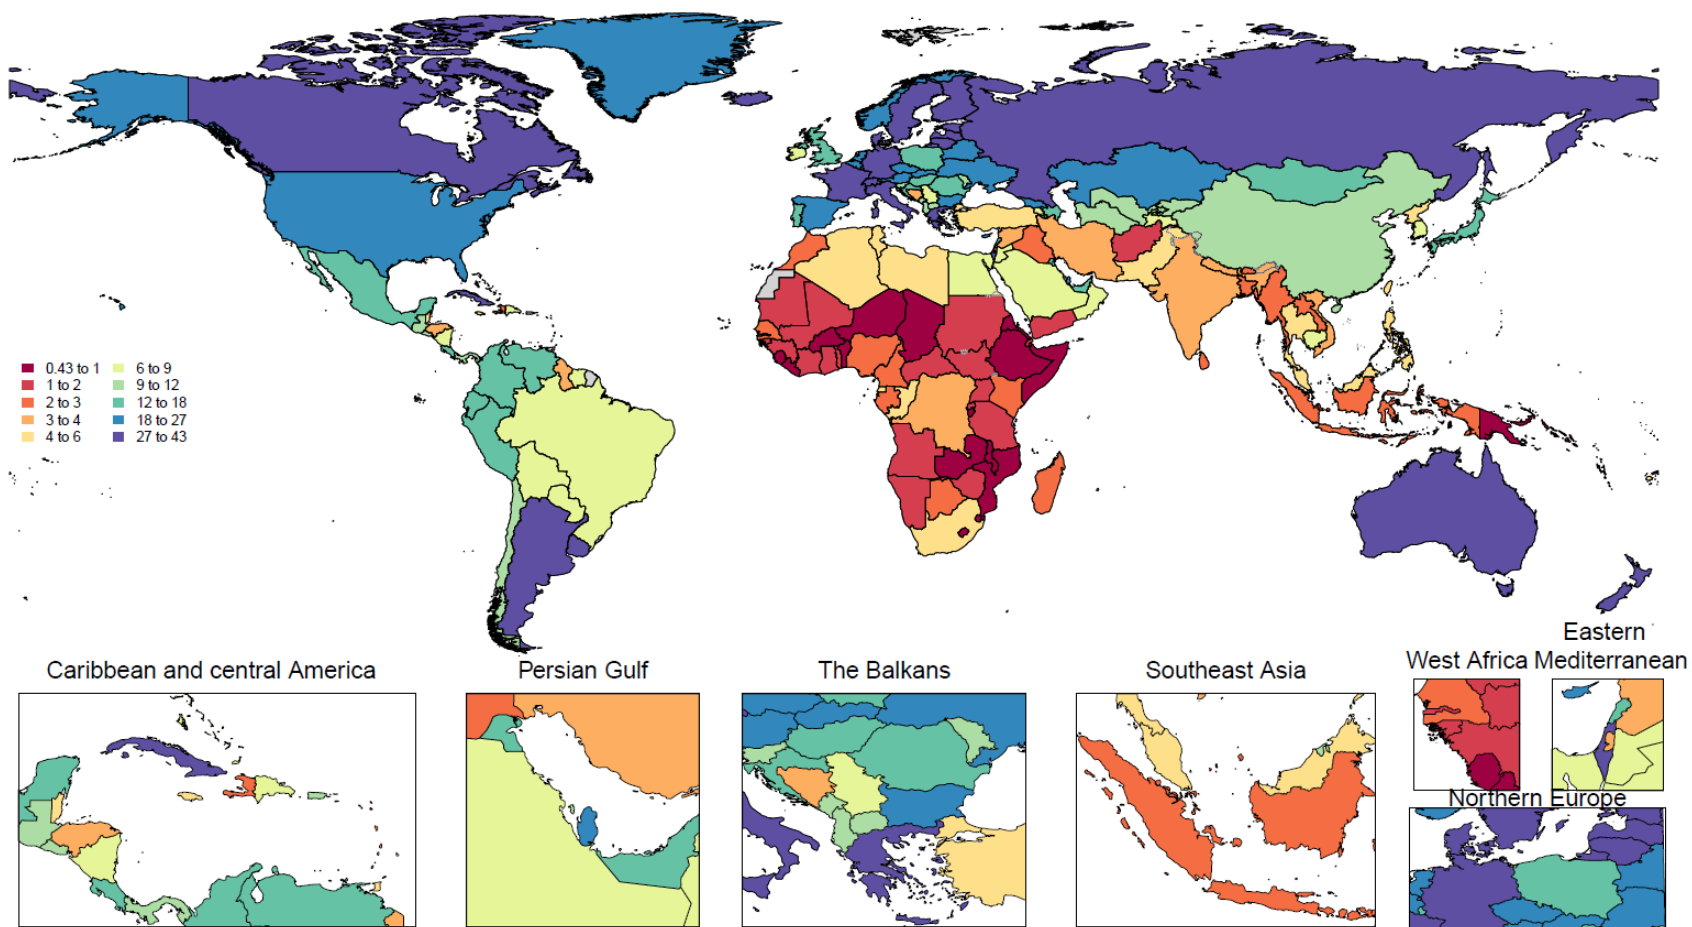

Appendix Figure 3b. Nurses and midwives per 10 000 population, 1990

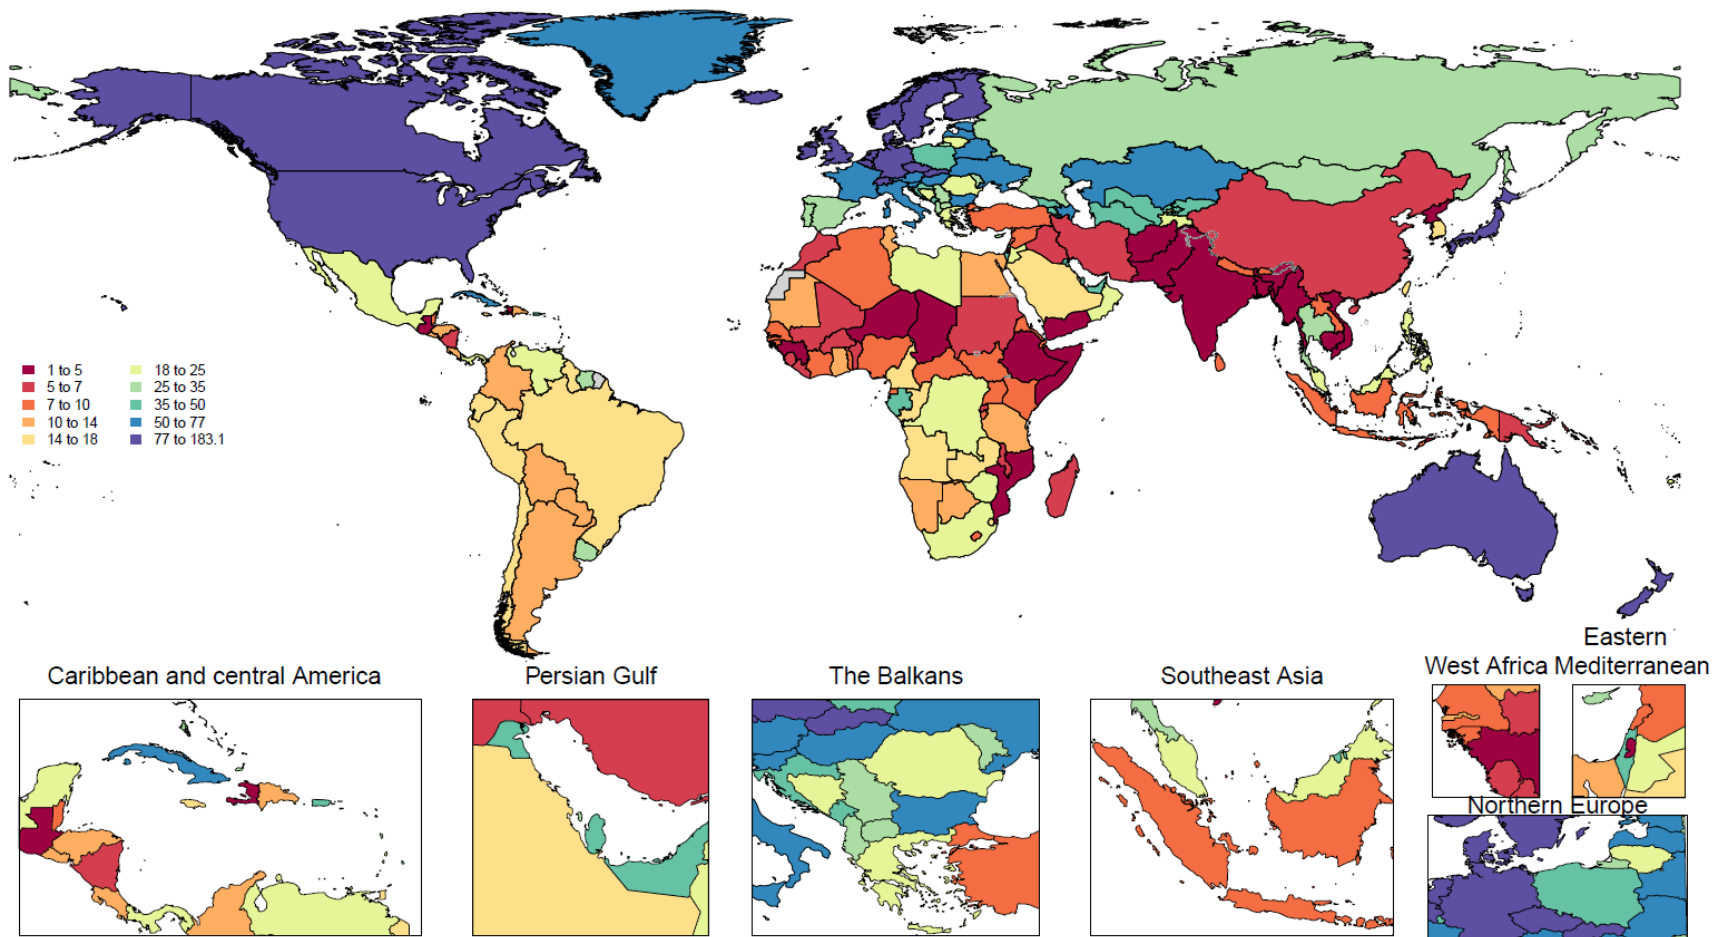

Appendix Figure 3c. Dentistry personnel per 10,000 population, 1990

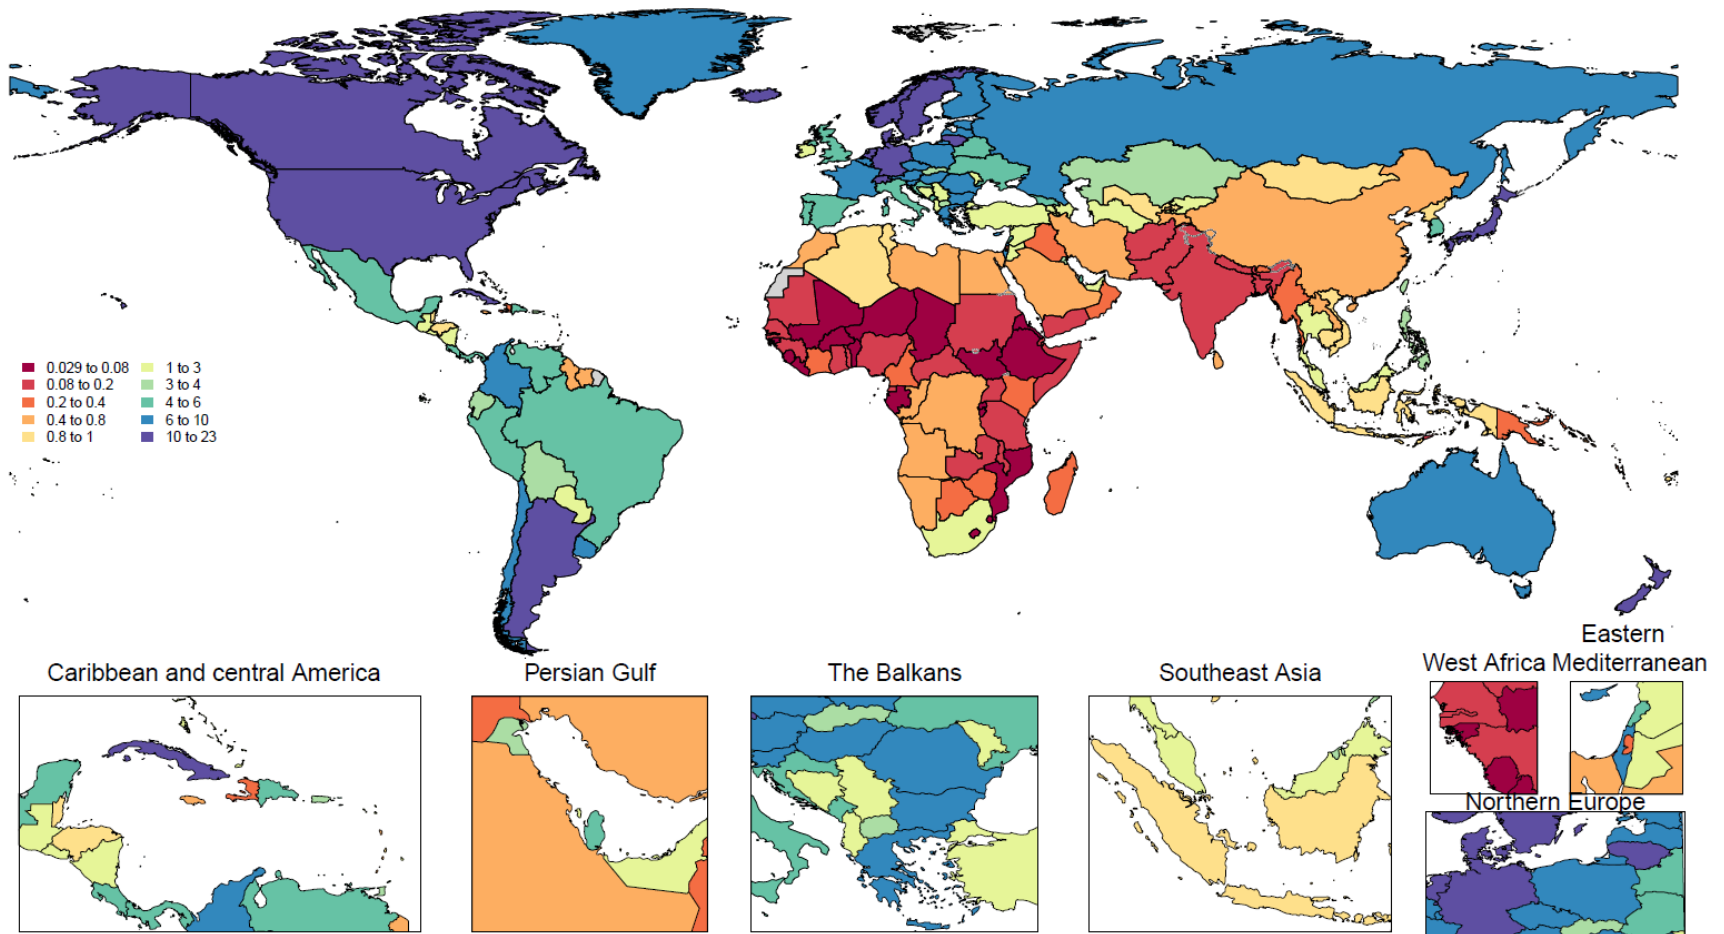

Appendix Figure 3d. Pharmaceutical personnel per 10,000 population, 1990

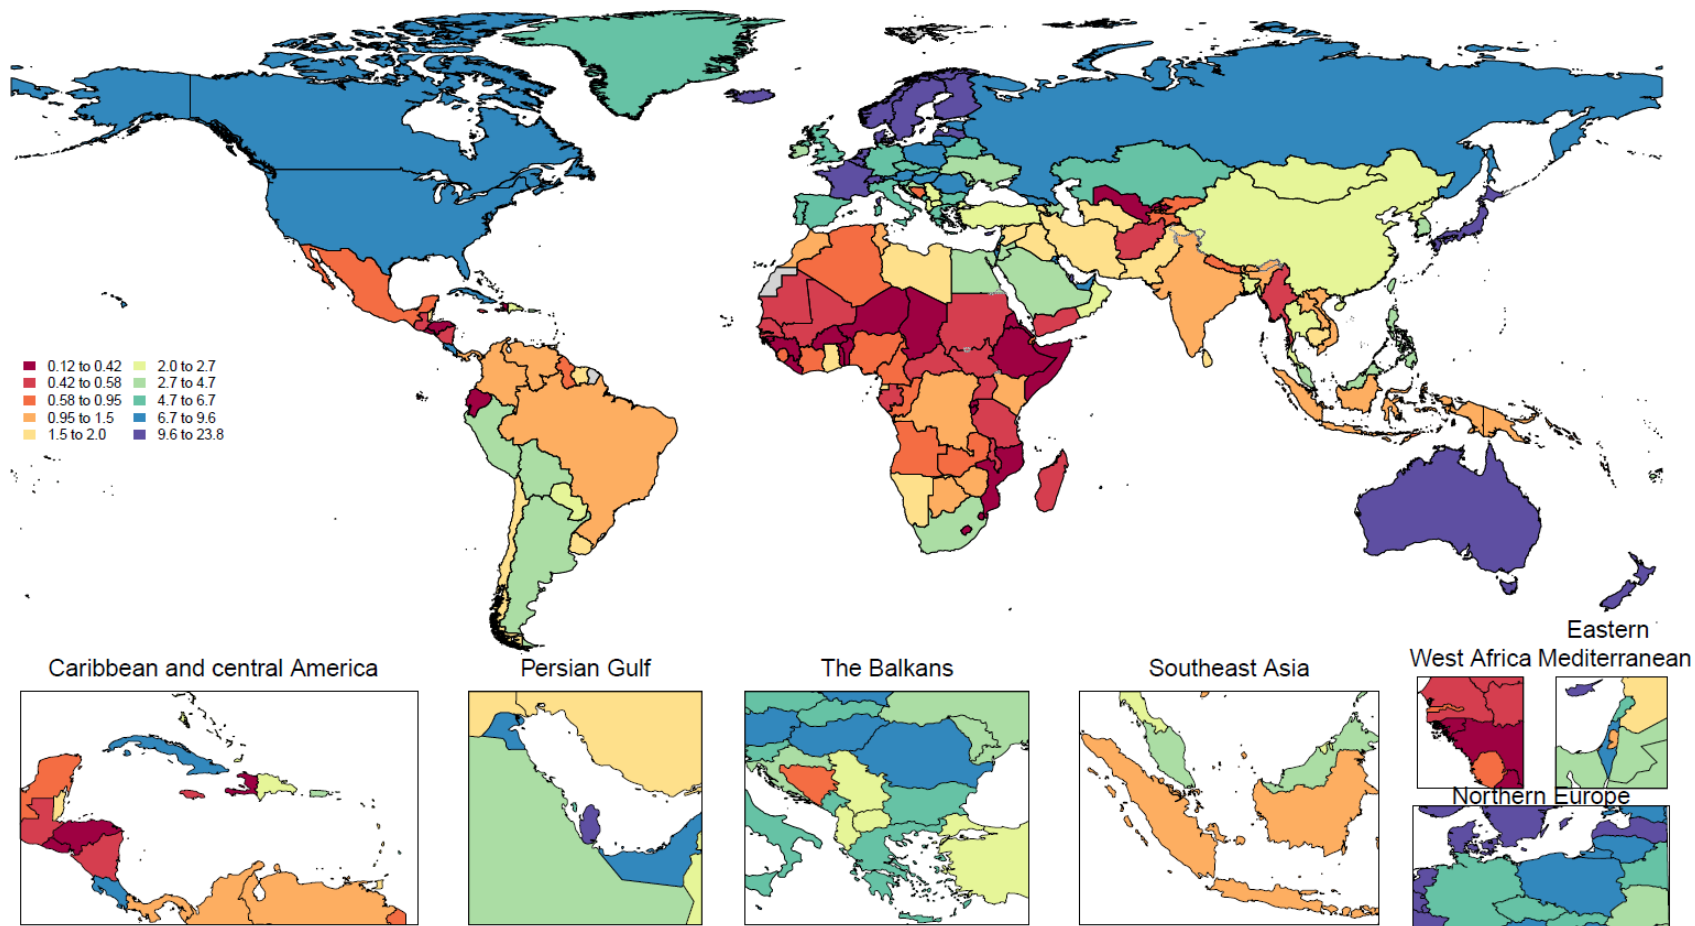

**Appendix Table 1.** Health worker counts for 16 cadres by GBD super-region, 2019

| Appendix table 1. Health worker counts for 16 cadres by GBD super-region, 2019 |                                           |                                                  |                                         |                                       |                                      |                                       |                                         |                                      |
|--------------------------------------------------------------------------------|-------------------------------------------|--------------------------------------------------|-----------------------------------------|---------------------------------------|--------------------------------------|---------------------------------------|-----------------------------------------|--------------------------------------|
|                                                                                | Global                                    | Central Europe, Eastern Europe, and Central Asia | High-income                             | Latin America and Caribbean           | North Africa and Middle East         | South Asia                            | Southeast Asia, East Asia, and Oceania  | Sub-Saharan Africa                   |
| Total population                                                               | 7,740,000,000                             | 418,000,000                                      | 1,080,000,000                           | 584,000,000                           | 609,000,000                          | 1,810,000,000                         | 2,160,000,000                           | 1,080,000,000                        |
| Physicians                                                                     | 12,800,000<br>(9,730,000 - 16,600,000)    | 1,610,000<br>(1,220,000 - 2,070,000)             | 23,600,000<br>(2,910,000 - 4,440,000)   | 1,140,000<br>(851,000 - 1,480,000)    | 664,000<br>(494,000 - 876,000)       | 1,170,000<br>(865,000 - 1,540,000)    | 4,340,000<br>(3,160,000 - 5,790,000)    | 314,000<br>(224,000 - 427,000)       |
| Nurses and midwives                                                            | 29,800,000<br>23,200,000 - 37,700,000     | 3,100,000<br>2,350,000 - 4,000,000               | 12,500,000<br>10,300,000 - 14,900,000   | 2,580,000<br>2,010,000 - 3,260,000    | 1,590,000<br>1,200,000 - 2,060,000   | 1,750,000<br>1,310,000 - 2,300,000    | 6,410,000<br>4,690,000 - 8,600,000      | 1,960,000<br>1,460,000 - 2,570,000   |
| Dentistry personnel                                                            | 4,620,000<br>3,550,000 - 5,970,000        | 476,000<br>363,000 - 618,000                     | 2,110,000<br>1,710,000 - 2,570,000      | 607,000<br>454,000 - 792,000          | 207,000<br>154,000 - 275,000         | 144,000<br>107,000 - 193,000          | 1,020,000<br>711,000 - 1,440,000        | 59,100<br>43,200 - 78,900            |
| Pharmaceutical personnel                                                       | 5,240,000<br>4,000,000 - 6,700,000        | 450,000<br>345,000 - 579,000                     | 1,650,000<br>1,340,000 - 2,000,000      | 305,000<br>230,000 - 396,000          | 478,000<br>362,000 - 617,000         | 726,000<br>552,000 - 936,000          | 1,470,000<br>1,060,000 - 1,950,000      | 157,000<br>115,000 - 209,000         |
| Healthcare aides, paramedics, and ambulance workers                            | 14,800,000<br>11,300,000 - 19,100,000     | 1,180,000<br>865,000 - 1,590,000                 | 9,290,000<br>7,370,000 - 11,500,000     | 1,240,000<br>909,000 - 1,660,000      | 250,000<br>173,000 - 350,000         | 692,000<br>500,000 - 935,000          | 1,680,000<br>1,150,000 - 2,390,000      | 503,000<br>360,000 - 684,000         |
| Audiologists, speech therapists, and counsellors                               | 3,010,000<br>2,150,000 - 4,100,000        | 514,000<br>378,000 - 691,000                     | 849,000<br>636,000 - 1,110,000          | 163,000<br>116,000 - 221,000          | 20,300<br>14,300 - 28,100            | 320,000<br>233,000 - 436,000          | 1,020,000<br>693,000 - 1,440,000        | 121,000<br>82,700 - 171,000          |
| Clinical officers, medical assistants, and community health workers            | 4,210,000<br>3,100,000 - 5,590,000        | 1,010,000<br>754,000 - 1,310,000                 | 1,630,000<br>1,240,000 - 2,100,000      | 369,000<br>256,000 - 510,000          | 226,000<br>161,000 - 308,000         | 443,000<br>325,000 - 600,000          | 306,000<br>206,000 - 439,000            | 228,000<br>155,000 - 321,000         |
| Dietitians and nutritionists                                                   | 1,240,000<br>896,000 - 1,660,000          | 147,000<br>107,000 - 195,000                     | 595,000<br>442,000 - 780,000            | 151,000<br>109,000 - 203,000          | 96,100<br>68,700 - 131,000           | 18,000<br>12,900 - 24,800             | 207,000<br>139,000 - 296,000            | 24,900<br>17,000 - 35,000            |
| Environmental health workers                                                   | 1,930,000<br>1,390,000 - 2,600,000        | 209,000<br>151,000 - 280,000                     | 508,000<br>388,000 - 660,000            | 466,000<br>347,000 - 610,000          | 147,000<br>103,000 - 205,000         | 65,200<br>46,800 - 89,900             | 464,000<br>311,000 - 659,000            | 69,000<br>47,300 - 97,200            |
| Medical laboratory technicians                                                 | 4,000,000<br>2,900,000 - 5,410,000        | 258,000<br>184,000 - 347,000                     | 1,690,000<br>1,280,000 - 2,190,000      | 324,000<br>231,000 - 441,000          | 243,000<br>171,000 - 336,000         | 167,000<br>120,000 - 227,000          | 813,000<br>551,000 - 1,150,000          | 81,300<br>55,600 - 115,000           |
| Optometrists and opticians                                                     | 944,000<br>681,000 - 1,280,000            | 115,000<br>82,500 - 156,000                      | 534,000<br>397,000 - 702,000            | 74,400<br>50,900 - 106,000            | 20,900<br>14,100 - 29,500            | 54,400<br>38,300 - 74,600             | 113,000<br>74,600 - 160,000             | 33,600<br>22,800 - 47,800            |
| Home-based personal care workers                                               | 11,200,000<br>8,210,000 - 14,900,000      | 307,000<br>224,000 - 410,000                     | 3,800,000<br>2,940,000 - 4,840,000      | 206,000<br>145,000 - 286,000          | 48,800<br>33,700 - 68,200            | 1,670,000<br>1,240,000 - 2,240,000    | 4,840,000<br>3,410,000 - 6,660,000      | 296,000<br>218,000 - 396,000         |
| Psychologists                                                                  | 2,520,000<br>1,840,000 - 3,360,000        | 301,000<br>223,000 - 399,000                     | 1,170,000<br>888,000 - 1,500,000        | 348,000<br>253,000 - 464,000          | 91,500<br>63,700 - 129,000           | 22,700<br>16,200 - 30,800             | 523,000<br>354,000 - 743,000            | 65,400<br>45,700 - 91,100            |
| Medical imaging and therapeutic equipment technicians                          | 3,110,000<br>2,240,000 - 4,220,000        | 100,000<br>71,900 - 135,000                      | 947,000<br>714,000 - 1,230,000          | 111,000<br>77,700 - 152,000           | 102,000<br>72,000 - 140,000          | 603,000<br>436,000 - 816,000          | 1,190,000<br>826,000 - 1,660,000        | 60,900<br>41,900 - 85,500            |
| Physiotherapists and prosthetic technicians                                    | 3,390,000<br>2,500,000 - 4,500,000        | 329,000<br>239,000 - 444,000                     | 2,030,000<br>1,530,000 - 2,630,000      | 421,000<br>305,000 - 566,000          | 54,500<br>38,100 - 76,200            | 63,000<br>45,100 - 85,600             | 429,000<br>294,000 - 601,000            | 71,600<br>50,600 - 99,000            |
| Traditional and complementary medicine practitioners                           | 2,230,000<br>1,580,000 - 3,070,000        | 39,800<br>27,600 - 55,600                        | 485,000<br>359,000 - 637,000            | 97,200<br>67,600 - 133,000            | 31,300<br>21,400 - 44,000            | 226,000<br>168,000 - 298,000          | 944,000<br>650,000 - 1,350,000          | 402,000<br>284,000 - 554,000         |
| All health workers                                                             | 104,000,000<br>(83,500,000 - 128,000,000) | 9,990,000<br>(7,990,000 - 12,400,000)            | 42,500,000<br>(36,000,000 - 49,800,000) | 8,470,000<br>(6,800,000 - 10,500,000) | 4,130,000<br>(3,210,000 - 5,220,000) | 8,370,000<br>(6,580,000 - 10,600,000) | 25,900,000<br>(19,600,000 - 33,800,000) | 4,330,000<br>(3,340,000 - 5,520,000) |

Parentheses reflect 95% uncertainty interval





|                                   |            |      |      |         |      |      |         |     |      |        |     |      |        |
|-----------------------------------|------------|------|------|---------|------|------|---------|-----|------|--------|-----|------|--------|
| Venezuela (Bolivarian Republic of | 28,068,986 | 18.8 | 5.1  | 14,189  | 27.9 | 40.9 | 114,734 | 7.1 | 0.3  | 770    | 2.4 | 11.8 | 33,073 |
| United States Virgin Islands      | 103,985    | 20.7 | 3.2  | 33      | 61.0 | 7.8  | 81      | 7.5 | -0.1 | 0      | 6.0 | 8.2  | 85     |
| Viet Nam                          | 96,372,928 | 7.7  | 16.2 | 156,425 | 9.9  | 58.9 | 567,604 | 4.3 | 3.1  | 29,559 | 6.7 | 7.5  | 71,916 |
| Vanuatu                           | 294,550    | 2.0  | 21.9 | 645     | 18.3 | 50.5 | 1,489   | 0.9 | 6.5  | 192    | 2.1 | 12.1 | 355    |
| Samoa                             | 211,354    | 3.1  | 20.8 | 439     | 17.0 | 51.8 | 1,094   | 2.3 | 5.1  | 107    | 2.7 | 11.5 | 244    |
| Yemen                             | 31,502,896 | 3.7  | 20.2 | 63,512  | 8.1  | 60.7 | 191,375 | 0.3 | 7.1  | 22,265 | 1.6 | 12.6 | 39,715 |
| South Africa                      | 55,588,425 | 8.3  | 15.6 | 86,595  | 34.6 | 34.2 | 190,236 | 2.5 | 4.9  | 27,163 | 3.9 | 10.3 | 57,420 |
| Zambia                            | 18,237,683 | 1.9  | 22.0 | 40,186  | 21.8 | 47.0 | 85,802  | 0.4 | 7.0  | 12,853 | 3.3 | 10.9 | 19,960 |
| Zimbabwe                          | 15,010,852 | 1.9  | 22.0 | 32,986  | 28.6 | 40.2 | 60,392  | 0.2 | 7.2  | 10,791 | 1.2 | 13.0 | 19,565 |

Shortage per 10 000 column reports the difference between the observed HRH density and that of the minimum threshold. Negative values reflect density in excess of the threshold.



**Appendix Table 3.** SDI quintile and UHC service coverage index by country and territory in 1990, 2000, 2005, 2010, 2015, and 2019

| Location                   | SDI Quintile    | UHC in 1990 | UHC in 2000 | UHC in 2010 | UHC in 2015 | UHC in 2019 |
|----------------------------|-----------------|-------------|-------------|-------------|-------------|-------------|
| Japan                      | High SDI        | 81.1        | 89.7        | 93.8        | 95.9        | 96.5        |
| Iceland                    | High SDI        | 78.4        | 86.5        | 94.0        | 94.7        | 95.5        |
| Norway                     | High SDI        | 72.2        | 80.2        | 90.3        | 93.6        | 94.4        |
| Switzerland                | High SDI        | 78.3        | 84.3        | 90.9        | 92.6        | 93.6        |
| San Marino                 | High SDI        | 83.4        | 88.5        | 91.6        | 92.2        | 92.9        |
| Singapore                  | High SDI        | 67.3        | 80.2        | 89.7        | 92.0        | 92.6        |
| Luxembourg                 | High SDI        | 66.4        | 78.0        | 87.7        | 90.9        | 91.6        |
| Monaco                     | High SDI        | 78.5        | 84.6        | 89.0        | 90.2        | 91.6        |
| Andorra                    | High SDI        | 80.6        | 86.1        | 90.6        | 90.7        | 91.5        |
| Finland                    | High SDI        | 71.7        | 81.5        | 88.8        | 91.4        | 91.5        |
| Sweden                     | High SDI        | 79.0        | 83.9        | 88.5        | 89.9        | 90.5        |
| Canada                     | High SDI        | 80.0        | 83.8        | 88.3        | 90.7        | 90.4        |
| Slovenia                   | High SDI        | 67.2        | 72.1        | 85.2        | 88.9        | 90.1        |
| Spain                      | High-middle SDI | 65.3        | 76.1        | 88.5        | 90.2        | 90.1        |
| France                     | High SDI        | 66.4        | 78.4        | 88.1        | 89.8        | 90.0        |
| Netherlands                | High SDI        | 70.0        | 77.2        | 87.7        | 90.2        | 89.8        |
| Australia                  | High SDI        | 72.4        | 81.8        | 88.5        | 89.3        | 89.6        |
| Republic of Korea          | High SDI        | 59.5        | 75.2        | 85.0        | 89.4        | 89.4        |
| Ireland                    | High SDI        | 63.4        | 74.6        | 86.5        | 88.7        | 89.2        |
| Italy                      | High-middle SDI | 70.6        | 77.9        | 87.1        | 87.9        | 89.2        |
| United Kingdom             | High SDI        | 67.9        | 76.5        | 86.2        | 87.7        | 88.1        |
| Belgium                    | High SDI        | 67.8        | 75.4        | 83.6        | 87.1        | 87.6        |
| Germany                    | High SDI        | 66.8        | 77.3        | 83.7        | 85.3        | 86.5        |
| Austria                    | High SDI        | 71.4        | 79.0        | 82.5        | 85.3        | 86.4        |
| Denmark                    | High SDI        | 65.5        | 71.1        | 81.0        | 84.2        | 84.3        |
| Portugal                   | High-middle SDI | 61.0        | 66.4        | 79.3        | 83.6        | 83.7        |
| Malta                      | High-middle SDI | 60.1        | 70.6        | 77.8        | 81.0        | 83.2        |
| New Zealand                | High SDI        | 68.3        | 73.6        | 82.4        | 83.3        | 83.2        |
| United States of America   | High SDI        | 73.8        | 75.5        | 81.4        | 82.1        | 82.3        |
| Czechia                    | High SDI        | 56.1        | 70.5        | 77.9        | 80.6        | 82.2        |
| Estonia                    | High SDI        | 60.2        | 62.6        | 75.1        | 82.1        | 82.1        |
| Kuwait                     | High SDI        | 65.4        | 67.5        | 75.1        | 82.1        | 81.9        |
| Israel                     | High-middle SDI | 59.6        | 69.0        | 78.8        | 81.3        | 81.6        |
| Qatar                      | High SDI        | 60.0        | 63.5        | 76.4        | 82.7        | 80.5        |
| Greece                     | High-middle SDI | 66.2        | 73.5        | 80.2        | 80.7        | 80.4        |
| Cyprus                     | High SDI        | 57.1        | 61.5        | 74.9        | 78.1        | 79.4        |
| Taiwan (Province of China) | High SDI        | 62.9        | 69.4        | 77.5        | 78.7        | 79.3        |
| Costa Rica                 | Middle SDI      | 66.1        | 69.2        | 74.1        | 78.5        | 79.2        |
| Croatia                    | High-middle SDI | 61.2        | 65.0        | 73.5        | 76.4        | 79.2        |
| Slovakia                   | High SDI        | 56.4        | 63.4        | 72.5        | 76.2        | 78.2        |
| Bermuda                    | High SDI        | 56.0        | 66.6        | 74.0        | 76.0        | 77.9        |
| Peru                       | Middle SDI      | 52.3        | 61.6        | 65.4        | 72.4        | 75.9        |
| Puerto Rico                | High SDI        | 51.4        | 60.1        | 72.4        | 75.3        | 75.7        |
| Lebanon                    | High-middle SDI | 54.4        | 66.2        | 69.1        | 72.5        | 74.7        |
| Chile                      | High-middle SDI | 56.2        | 65.6        | 68.4        | 72.2        | 74.6        |
| Colombia                   | Middle SDI      | 55.8        | 58.0        | 66.5        | 71.8        | 74.6        |
| Cuba                       | Middle SDI      | 59.5        | 66.5        | 71.2        | 71.3        | 72.9        |
| Poland                     | High-middle SDI | 50.0        | 56.7        | 68.5        | 71.6        | 72.9        |
| Hungary                    | High-middle SDI | 53.9        | 63.7        | 67.4        | 70.0        | 72.3        |
| Thailand                   | Middle SDI      | 60.4        | 55.4        | 66.2        | 69.6        | 71.7        |
| Panama                     | Middle SDI      | 54.2        | 59.9        | 64.1        | 67.3        | 71.4        |
| Bahrain                    | High-middle SDI | 55.0        | 58.5        | 66.5        | 72.4        | 70.8        |
| Belarus                    | High-middle SDI | 57.3        | 53.7        | 58.7        | 68.5        | 70.7        |
| Lithuania                  | High SDI        | 60.7        | 64.0        | 66.2        | 69.9        | 70.6        |
| Jordan                     | High-middle SDI | 53.0        | 57.2        | 68.0        | 70.2        | 70.1        |
| Latvia                     | High SDI        | 55.5        | 53.3        | 62.2        | 65.4        | 70.1        |
| Albania                    | Middle SDI      | 54.6        | 60.3        | 68.7        | 67.8        | 69.9        |
| China                      | Middle SDI      | 49.8        | 53.2        | 63.2        | 67.9        | 69.9        |
| Romania                    | High-middle SDI | 50.2        | 55.7        | 62.8        | 68.4        | 69.9        |
| Iran (Islamic Republic of) | Middle SDI      | 52.6        | 60.3        | 62.3        | 65.8        | 69.7        |
| Turkey                     | High-middle SDI | 48.0        | 57.6        | 64.6        | 66.3        | 69.5        |
| Russian Federation         | High-middle SDI | 54.4        | 47.5        | 57.8        | 64.2        | 69.2        |

|                                    |                 |       |       |       |       |       |
|------------------------------------|-----------------|-------|-------|-------|-------|-------|
| Greenland                          | High-middle SDI | 54 .4 | 57 .4 | 63 .7 | 67 .9 | 69.0  |
| Oman                               | High-middle SDI | 53 .7 | 59 .8 | 60 .5 | 64 .4 | 68 .7 |
| Uruguay                            | High-middle SDI | 53 .5 | 61 .2 | 64 .3 | 67 .3 | 68 .7 |
| Tunisia                            | Middle SDI      | 56.0  | 60 .7 | 63 .8 | 67.0  | 68 .3 |
| Maldives                           | Low-middle SDI  | 37.0  | 51 .3 | 63 .9 | 67.0  | 67.0  |
| Malaysia                           | High-middle SDI | 52 .1 | 56 .1 | 62 .2 | 64.0  | 66 .8 |
| Libya                              | High-middle SDI | 57 .9 | 63 .5 | 66 .8 | 67 .5 | 66 .5 |
| Montenegro                         | High-middle SDI | 63 .5 | 57 .8 | 63 .7 | 64.0  | 66 .3 |
| Sri Lanka                          | High-middle SDI | 53 .5 | 54 .5 | 57 .3 | 62 .1 | 66.0  |
| Brazil                             | Middle SDI      | 41 .6 | 50 .9 | 59 .2 | 62 .9 | 65 .7 |
| Brunei Darussalam                  | High SDI        | 52 .5 | 60 .7 | 63 .2 | 63 .5 | 65 .7 |
| Algeria                            | Middle SDI      | 48 .6 | 57 .6 | 62 .6 | 64 .8 | 65.0  |
| Ecuador                            | Middle SDI      | 51 .5 | 57 .3 | 57 .3 | 60 .1 | 64 .6 |
| Saudi Arabia                       | High SDI        | 50 .3 | 53 .7 | 58 .7 | 62 .5 | 64 .5 |
| Bosnia and Herzegovina             | High-middle SDI | 54 .4 | 62 .1 | 61 .8 | 62 .6 | 64 .4 |
| Guam                               | High SDI        | 63 .1 | 68 .3 | 67 .2 | 63 .4 | 63 .9 |
| Paraguay                           | Middle SDI      | 53 .4 | 57 .8 | 59 .7 | 60 .8 | 63 .6 |
| Serbia                             | High-middle SDI | 49 .3 | 51 .4 | 56 .9 | 61 .8 | 63 .6 |
| United Arab Emirates               | High SDI        | 55 .3 | 55 .6 | 63 .5 | 63 .1 | 63 .6 |
| Bulgaria                           | High-middle SDI | 52 .6 | 52.0  | 56 .5 | 61 .3 | 62 .8 |
| Armenia                            | Middle SDI      | 46 .9 | 53 .2 | 55 .9 | 60 .4 | 62 .7 |
| Cook Islands                       | High-middle SDI | 52 .9 | 60 .3 | 64 .7 | 60 .5 | 62 .4 |
| Republic of Moldova                | High-middle SDI | 48 .6 | 48 .1 | 48 .8 | 56.0  | 62 .3 |
| Cabo Verde                         | Low-middle SDI  | 49 .7 | 52 .2 | 61 .3 | 58 .7 | 62 .2 |
| Namibia                            | Middle SDI      | 43 .9 | 34 .2 | 49 .3 | 60 .7 | 62 .2 |
| El Salvador                        | Low-middle SDI  | 41 .8 | 50 .6 | 56 .7 | 59 .3 | 61 .7 |
| Seychelles                         | High-middle SDI | 54 .7 | 56 .4 | 60 .4 | 60 .1 | 61 .7 |
| Mexico                             | Middle SDI      | 46 .2 | 53 .5 | 58.0  | 59 .2 | 61 .5 |
| Palestine                          | Low-middle SDI  | 47 .2 | 51 .6 | 56 .7 | 60 .8 | 61 .4 |
| Argentina                          | High-middle SDI | 46 .8 | 53 .5 | 59 .1 | 62 .1 | 61 .3 |
| Barbados                           | High-middle SDI | 46 .8 | 53 .2 | 60 .9 | 62 .3 | 61 .3 |
| Venezuela (Bolivarian Republic of) | Low-middle SDI  | 51 .2 | 52 .6 | 60 .5 | 62 .3 | 61 .1 |
| North Macedonia                    | High-middle SDI | 49 .6 | 52 .8 | 56.0  | 59.0  | 61.0  |
| Bahamas                            | High-middle SDI | 45 .8 | 52.0  | 60.0  | 60 .6 | 60 .7 |
| Northern Mariana Islands           | High-middle SDI | 62 .7 | 62 .7 | 63 .8 | 62 .5 | 60 .6 |
| Rwanda                             | Low SDI         | 23 .5 | 24 .6 | 45 .5 | 52 .2 | 60 .5 |
| Antigua and Barbuda                | High-middle SDI | 47 .3 | 51 .9 | 60.0  | 57 .7 | 59 .8 |
| Viet Nam                           | Middle SDI      | 47 .6 | 51 .5 | 56 .8 | 57 .1 | 59 .8 |
| South Africa                       | Middle SDI      | 48 .5 | 34 .9 | 40 .6 | 49 .7 | 59 .7 |
| Kazakhstan                         | High-middle SDI | 44 .9 | 38 .1 | 50 .2 | 56 .8 | 59 .4 |
| Saint Lucia                        | Middle SDI      | 40 .2 | 50 .1 | 58 .4 | 59 .1 | 59 .4 |
| Morocco                            | Low-middle SDI  | 40 .8 | 49.0  | 53 .4 | 53 .6 | 58.0  |
| Iraq                               | Middle SDI      | 45 .5 | 47 .6 | 50 .8 | 54 .1 | 57 .8 |
| Syrian Arab Republic               | Middle SDI      | 45 .5 | 53 .2 | 56 .6 | 55 .4 | 57 .7 |
| Botswana                           | Middle SDI      | 44 .5 | 37 .7 | 46 .6 | 50 .8 | 57 .6 |
| Egypt                              | Middle SDI      | 38 .2 | 48 .8 | 50 .1 | 54 .1 | 57 .5 |
| Cambodia                           | Low-middle SDI  | 30.0  | 35 .3 | 50 .1 | 50 .8 | 57 .1 |
| Jamaica                            | Middle SDI      | 44 .8 | 47 .1 | 57 .7 | 58.0  | 57.0  |
| Nicaragua                          | Low-middle SDI  | 47 .3 | 51 .4 | 51 .5 | 54 .6 | 56 .9 |
| Ukraine                            | High-middle SDI | 54 .2 | 45 .3 | 56 .6 | 56 .4 | 56 .9 |
| Georgia                            | High-middle SDI | 44.0  | 49 .5 | 53 .4 | 55 .1 | 56 .3 |
| Mauritius                          | High-middle SDI | 44.0  | 46 .5 | 49 .2 | 54 .2 | 56.0  |
| Malawi                             | Low SDI         | 31 .8 | 30.0  | 42 .1 | 47 .9 | 55 .8 |
| Trinidad and Tobago                | High-middle SDI | 37 .7 | 39 .9 | 52.0  | 55 .1 | 55 .7 |
| Zimbabwe                           | Low-middle SDI  | 44 .5 | 34 .4 | 34 .5 | 42 .2 | 55 .5 |
| United Republic of Tanzania        | Low SDI         | 35 .3 | 38 .5 | 45 .3 | 49 .6 | 55 .4 |
| Philippines                        | Middle SDI      | 59 .7 | 50 .9 | 49 .2 | 50 .4 | 54 .8 |
| Sao Tome and Principe              | Low-middle SDI  | 41 .8 | 44 .9 | 51 .1 | 52 .6 | 54 .8 |
| Tokelau                            | Middle SDI      | 43 .4 | 43 .7 | 52 .6 | 54 .9 | 54 .7 |
| Belize                             | Low-middle SDI  | 39 .7 | 37 .2 | 52 .3 | 54 .8 | 54 .5 |
| Honduras                           | Low-middle SDI  | 47.0  | 44 .3 | 52 .7 | 52 .3 | 54 .3 |
| Bangladesh                         | Low-middle SDI  | 31 .5 | 42 .4 | 50 .3 | 54 .6 | 54.0  |
| United States Virgin Islands       | High-middle SDI | 47 .8 | 54 .1 | 52 .7 | 52 .4 | 53 .9 |
| American Samoa                     | High-middle SDI | 54.0  | 54 .6 | 54 .2 | 54 .4 | 53 .4 |
| Eswatini                           | Low-middle SDI  | 44 .6 | 32 .1 | 35 .8 | 46 .8 | 53 .4 |
| Mauritania                         | Low-middle SDI  | 27.0  | 38 .1 | 46 .2 | 48 .5 | 53 .3 |

|                                       |                 |      |      |      |      |      |
|---------------------------------------|-----------------|------|------|------|------|------|
| Gabon                                 | Middle SDI      | 35.8 | 35.5 | 42.1 | 49.0 | 53.1 |
| Democratic People's Republic of Korea | Low-middle SDI  | 46.6 | 47.4 | 49.9 | 50.7 | 53.0 |
| Kyrgyzstan                            | Low-middle SDI  | 35.0 | 32.5 | 42.8 | 48.0 | 53.0 |
| Saint Kitts and Nevis                 | High-middle SDI | 35.9 | 45.7 | 55.6 | 56.0 | 53.0 |
| Uganda                                | Low SDI         | 32.0 | 29.0 | 40.1 | 46.1 | 52.8 |
| Zambia                                | Low-middle SDI  | 29.7 | 25.9 | 38.3 | 45.3 | 52.7 |
| Dominican Republic                    | Low-middle SDI  | 37.7 | 45.9 | 48.6 | 47.2 | 52.6 |
| Tonga                                 | Middle SDI      | 54.2 | 50.3 | 51.8 | 52.5 | 52.6 |
| Bolivia (Plurinational State of)      | Low-middle SDI  | 29.0 | 37.3 | 45.0 | 48.3 | 52.4 |
| Guatemala                             | Low-middle SDI  | 39.4 | 40.2 | 47.5 | 49.2 | 52.3 |
| Dominica                              | High-middle SDI | 44.2 | 49.2 | 51.6 | 50.8 | 51.9 |
| Sudan                                 | Low-middle SDI  | 27.5 | 35.2 | 44.5 | 48.9 | 51.9 |
| Kenya                                 | Low-middle SDI  | 42.8 | 35.1 | 42.2 | 47.7 | 51.6 |
| Bhutan                                | Low-middle SDI  | 42.2 | 44.0 | 51.9 | 54.4 | 51.4 |
| Niue                                  | High-middle SDI | 47.9 | 42.0 | 48.7 | 49.7 | 51.2 |
| Grenada                               | Middle SDI      | 34.0 | 44.1 | 48.5 | 51.1 | 50.6 |
| Suriname                              | Middle SDI      | 36.5 | 41.9 | 49.0 | 50.7 | 50.3 |
| Equatorial Guinea                     | Middle SDI      | 16.7 | 27.4 | 42.6 | 43.0 | 50.1 |
| Burundi                               | Low SDI         | 26.8 | 25.4 | 38.1 | 42.8 | 49.9 |
| Samoa                                 | Middle SDI      | 39.6 | 43.3 | 43.6 | 47.0 | 49.9 |
| Saint Vincent and the Grenadines      | Middle SDI      | 37.9 | 43.4 | 49.9 | 47.3 | 49.7 |
| Senegal                               | Low SDI         | 32.0 | 38.4 | 45.1 | 45.6 | 49.7 |
| Ghana                                 | Low-middle SDI  | 29.4 | 37.4 | 41.8 | 40.6 | 49.3 |
| Yemen                                 | Low SDI         | 30.3 | 35.8 | 47.8 | 48.0 | 49.1 |
| Indonesia                             | Middle SDI      | 38.6 | 43.1 | 47.4 | 49.7 | 48.7 |
| Azerbaijan                            | Middle SDI      | 32.0 | 31.4 | 40.4 | 45.1 | 48.3 |
| Comoros                               | Low SDI         | 35.6 | 36.0 | 41.5 | 44.6 | 48.2 |
| Gambia                                | Low SDI         | 47.5 | 44.1 | 46.0 | 48.4 | 48.2 |
| Mongolia                              | Low-middle SDI  | 27.4 | 28.0 | 42.4 | 50.5 | 47.9 |
| Nepal                                 | Low SDI         | 29.1 | 39.9 | 44.9 | 44.5 | 47.4 |
| Myanmar                               | Low-middle SDI  | 28.1 | 32.7 | 39.1 | 40.9 | 47.0 |
| India                                 | Low-middle SDI  | 26.8 | 32.1 | 42.1 | 48.0 | 46.9 |
| Liberia                               | Low SDI         | 19.3 | 28.7 | 36.8 | 41.1 | 46.9 |
| Ethiopia                              | Low SDI         | 9.8  | 15.5 | 35.8 | 42.5 | 46.5 |
| Tajikistan                            | Low-middle SDI  | 41.6 | 36.6 | 40.5 | 42.1 | 46.4 |
| Timor-Leste                           | Low-middle SDI  | 30.7 | 32.1 | 45.7 | 46.5 | 46.0 |
| Djibouti                              | Low-middle SDI  | 38.7 | 33.6 | 40.6 | 42.3 | 45.4 |
| Fiji                                  | Middle SDI      | 44.5 | 38.4 | 42.6 | 43.8 | 45.3 |
| Democratic Republic of the Congo      | Low SDI         | 22.9 | 20.6 | 30.0 | 37.0 | 45.2 |
| Palau                                 | High-middle SDI | 46.1 | 45.5 | 49.6 | 48.1 | 45.0 |
| Benin                                 | Low SDI         | 27.3 | 31.3 | 35.7 | 37.9 | 44.7 |
| Marshall Islands                      | Low-middle SDI  | 38.9 | 37.2 | 42.3 | 42.3 | 44.3 |
| Turkmenistan                          | Middle SDI      | 31.9 | 30.3 | 39.1 | 40.6 | 44.2 |
| Congo                                 | Low-middle SDI  | 25.0 | 23.6 | 35.9 | 39.9 | 44.1 |
| Mozambique                            | Low SDI         | 24.1 | 31.7 | 31.5 | 36.9 | 44.1 |
| Lao People's Democratic Republic      | Low-middle SDI  | 15.2 | 21.2 | 34.6 | 38.6 | 43.9 |
| Côte d'Ivoire                         | Low SDI         | 26.5 | 26.9 | 33.8 | 37.2 | 43.2 |
| Togo                                  | Low SDI         | 32.6 | 27.8 | 33.6 | 39.4 | 42.8 |
| Cameroon                              | Low-middle SDI  | 29.1 | 26.0 | 31.0 | 35.6 | 42.3 |
| Uzbekistan                            | Middle SDI      | 38.0 | 30.2 | 35.8 | 37.0 | 42.3 |
| Eritrea                               | Low SDI         | 17.5 | 32.5 | 35.1 | 39.2 | 42.2 |
| Sierra Leone                          | Low SDI         | 28.4 | 28.8 | 36.8 | 40.4 | 42.2 |
| Nauru                                 | Middle SDI      | 39.8 | 32.9 | 38.5 | 43.8 | 42.1 |
| Burkina Faso                          | Low SDI         | 22.9 | 25.4 | 37.7 | 40.2 | 41.7 |
| Mali                                  | Low SDI         | 20.9 | 26.2 | 35.5 | 38.0 | 41.5 |
| South Sudan                           | Low SDI         | 29.8 | 32.4 | 34.4 | 37.3 | 41.5 |
| Guyana                                | Middle SDI      | 23.4 | 26.2 | 33.4 | 37.1 | 40.7 |
| Madagascar                            | Low SDI         | 30.5 | 32.8 | 36.2 | 37.2 | 39.7 |
| Tuvalu                                | Low-middle SDI  | 29.4 | 33.5 | 39.0 | 39.2 | 39.7 |
| Solomon Islands                       | Low SDI         | 25.5 | 25.6 | 33.3 | 30.8 | 39.5 |
| Afghanistan                           | Low SDI         | 21.9 | 20.2 | 31.2 | 36.6 | 39.4 |
| Angola                                | Low-middle SDI  | 18.7 | 21.6 | 31.5 | 35.5 | 39.3 |
| Pakistan                              | Low SDI         | 36.2 | 33.3 | 35.1 | 36.8 | 39.2 |
| Lesotho                               | Low-middle SDI  | 39.1 | 29.8 | 32.1 | 37.8 | 38.8 |
| Nigeria                               | Low-middle SDI  | 22.8 | 22.1 | 31.7 | 32.8 | 38.3 |
| Papua New Guinea                      | Low SDI         | 35.6 | 34.1 | 33.0 | 36.3 | 37.9 |

|                                  |                |      |      |      |      |      |
|----------------------------------|----------------|------|------|------|------|------|
| Haiti                            | Low SDI        | 11.9 | 19.4 | 25.1 | 29.3 | 35.9 |
| Kiribati                         | Low-middle SDI | 25.8 | 28.5 | 32.1 | 33.5 | 35.9 |
| Guinea-Bissau                    | Low SDI        | 18.5 | 20.5 | 23.7 | 29.1 | 35.6 |
| Niger                            | Low SDI        | 18.2 | 19.4 | 31.5 | 31.2 | 35.0 |
| Micronesia (Federated States of) | Low-middle SDI | 34.3 | 34.4 | 38.1 | 36.2 | 34.6 |
| Vanuatu                          | Low-middle SDI | 33.5 | 35.2 | 33.8 | 34.0 | 34.3 |
| Guinea                           | Low SDI        | 20.7 | 24.6 | 31.4 | 27.3 | 32.4 |
| Chad                             | Low SDI        | 21.0 | 18.4 | 26.1 | 28.9 | 31.3 |
| Somalia                          | Low SDI        | 15.2 | 16.3 | 18.8 | 21.6 | 24.0 |
| Central African Republic         | Low SDI        | 17.7 | 15.2 | 16.7 | 16.9 | 22.1 |

Table in order by 2019 UHC score.
